# Stress and Autonomic Nervous System in Type II Diabetes

## A Hypothesis

**M**any investigators have begun to speculate that the sympathetic nervous system is involved in the pathophysiology of type II (non-insulin-dependent) diabetes mellitus (1–4). Recalling the early observations of Claude Bernard, who found that hyperglycemia could be produced in normal rabbits by lesioning the area of the hypothalamus, several groups have noted that hyperglycemia can be produced by chemical stimulation of the brain with morphine as well as with a variety of endogenous neuropeptides and can be abolished by bilateral adrenalectomy (1,5). Similarly, hyperglycemia has been shown to result from slow intravenous infusion of epinephrine (6) as well as from certain forms of stress that produce prolonged sympathetic discharge (7).

Indeed, there is mounting experimental evidence of altered sympathetic nervous system activity in type II diabetes. Exaggerated suppression of insulin secretion and profound hyperglycemia in response to epinephrine have been repeatedly noted in several animal models of type II diabetes (8–10). This hyperresponsivity to epinephrine appears to coincide with an exaggerated insulin response to phentolamine in these animals, suggesting the presence of enhanced sensitivity of  $\alpha_2$ -receptors in the pancreas and possibly at other sites as well (9,10). There is also substantial evidence of altered adrenergic sensitivity in humans with type II diabetes. As in animals, adrenergic blockade with phentolamine produces a much larger increase in insulin secretion in diabetic individuals than it does in healthy control subjects (11,12). Furthermore, patients with type II diabetes appear to have higher levels of circulating catecholamines than

do normal individuals (12). Finally, the elevated levels of endogenous opioid peptides that have been reported in animal models (13) as well as in human type II diabetes (14) may also be a sign of abnormal sympathetic nervous system activity. Opioid peptides act as neuromodulators for presynaptic inhibition in sympathetic ganglia (15) and opioid receptors are found on sympathetic nerve terminals, providing a site for postsynaptic inhibition. Acute opiate blockade can reverse circulatory shock (16), can potentiate the cardiovascular effects of psychologic stress (17), and can increase blood pressure in patients with pheochromocytoma (18). Therefore, the high levels of endogenous opioid peptides found in the pancreas and plasma in type II diabetes may actually serve to attenuate the hyperglycemic effects of sympathetic nervous system activity. We have recently shown that opiate blockade with naltrexone will aggravate stress hyperglycemia in diabetic but not normal mice, lending support to this notion (19).

Whether these changes in sympathetic nervous system activity are associated with the onset of type II diabetes or are secondary to hyperglycemia, interventions to reduce sympathetic nervous system activity should, in theory, be useful in modulating hyperglycemia excursions. In recent studies,  $\alpha_2$ -blockade has been shown to improve glucose tolerance and increase insulin secretion in diabetic obese mice (20) and increase both meal-stimulated insulin secretion and glucose disposal in patients with type II diabetes (21). Long-term  $\alpha_2$ -blockade has been observed to produce clinically significant improvements in glycohemoglobin and fasting plasma glucose (21,22). The relevance of these observations is highlighted by the report that clonidine, which binds to  $\alpha_2$ -receptors, inhibits the binding of the oral hyperglycemic agent glyburide in the pancreas, suggesting that part of the effect of glyburide on insulin

From the Departments of Psychiatry and Medicine, Duke University Medical Center, Durham, North Carolina.

Address correspondence and reprint requests to Richard S. Surwit, Box 3842, Duke University Medical Center, Durham, NC 27710.

secretion may be related to an effect on adrenergic activity (23).

Both psychologic and physical stress stimulate sympathetic nervous system activity (24). Therefore, if sympathetic nervous system activity is altered in type II diabetes, patients with this disease may be extremely sensitive to the effects of psychologic stress. The possible role of psychologic stress in the etiology of diabetes was first suggested by Willis (25) and later noted by Maudsley (26). Although the effects of stress on type I (insulin-dependent) diabetes are controversial (27,28), there is mounting evidence that stress is important in glycemic control in type II diabetes. Stress has been shown to precipitate hyperglycemia in several animal models of type II diabetes (8,29). Moreover, exaggerated hyperglycemia can be classically conditioned in at least one animal model of the disease. By temporally pairing a known stressor (shaking) to the sound of a metronome, the metronome itself can become a potent hyperglycemic stimulus in obese diabetic, but not lean, mice (30). This suggests that psychologic as well as physical stressors can severely disrupt glucose metabolism when type II diabetes is present. There are, unfortunately, no human data that directly support or refute this hypothesis. Previous research on the effects of stress on glycemic control has not differentiated the effects of stress on type I from those on type II diabetes. However, available data suggest that stress reduction techniques may have a singular utility in the treatment of type II diabetes. As early as 1892, Osler (31) advised the use of rest and opiates in the treatment of "hyperglycemia of obesity," which probably corresponds to what is considered to be type II diabetes today. It has recently been shown that relaxation training can reduce hyperglycemia in human type II diabetes (32,33) but not type I diabetes (34–36) and that some benzodiazepines can reduce hyperglycemia in response to stress in an animal model of type II diabetes (37). Preliminary data from our laboratory indicate that some benzodiazepines may also improve glucose tolerance in human type II diabetes.

In summary, there is evidence from both animal and human studies of increased  $\alpha$ -adrenergic sensitivity in the endocrine pancreas and other tissues in type II diabetes. The resultant exaggeration of sympathetic nervous system effects would impair both insulin secretion and glucose utilization, the pathophysiologic hallmarks of the disease. This hypothesis does not require the presence of unusual psychologic stress for metabolic dysregulation to occur in that the metabolic effects of even normal sympathetic nervous system activity appear to be exaggerated. Thus, type II diabetes may be, in part, a problem of neurally regulated homeostasis in which stress and the autonomic nervous system interact in contributing to the development and/or the course of the disease. This hypothesis is consistent with the early theoretical speculations of Claude Bernard and the clinical observations of Willis, Osler, and Maudsley. Further investigation will determine its relevance to our understanding of the etiology and treatment of type II diabetes.

## ACKNOWLEDGMENTS

Preparation of this manuscript was supported in part by funds from research Grants R01-DK-29989 and K02-MH-00303 and by funds from the Research Network on the Determinants and Consequences of Health Promoting and Health Damaging Behavior of the John D. and Catherine T. MacArthur Foundation.

## REFERENCES

- Guillemin R: Hypothalamus, hormones and physiological regulation. In *Claude Bernard and the Internal Environment: A Memorial Symposium*. Debbs-Robin E, Ed. New York, Dekker, 1978, p. 137–56
- Giugliano D: Morphine, opioid peptides, and pancreatic islet function. *Diabetes Care* 7:92–98, 1984
- Feldberg W, Pike DA, Stubbs WA: On the origin of non-insulin-dependent diabetes. *Lancet* 1:1263–64, 1985
- Ipp E, Dhorajiwala J, Pugh W, Moossa AR, Rubinstein AH: Effects of an enkephalin analog on pancreatic endocrine function and glucose homeostasis in normal and diabetic dogs. *Endocrinology* 111:461–63, 1982
- Van Loon GR, Appel N:  $\alpha$ -Endorphin-induced hyperglycemia is mediated by increased central sympathetic outflow to adrenal medulla. *Brain Res* 204:236–41, 1981
- Lori CF, Lori GT, Buchwald KW: The mechanism of epinephrine action vs. changes in blood sugar, lactic acid and blood pressure during continuous intravenous injection of epinephrine. *Am J Physiol* 93:273–83, 1930
- Woods SC, Smith PH, Porte D: The role of the nervous system in metabolic regulation and its effect on diabetes and obesity. In *Handbook of Diabetes Mellitus*. Vol 3. Brownless M, Ed. New York, Garland, 1981, p. 208–71
- Surwit RS, Feinglos MN, Livingston EG, Kuhn CM, McCubbin JA: Behavioral manipulation of the diabetic phenotype in *ob/ob* mice. *Diabetes* 33:616–18, 1984
- Fujimoto K, Sakaguchi T, Ui M: Adrenergic mechanisms in the hyperglycaemia and hyperinsulinaemia of diabetic KK mice. *Diabetologia* 20:568–72, 1981
- Kuhn CM, Cochrane C, Feinglos MN, Surwit RS: Exaggerated peripheral responsiveness to catecholamines contributes to stress-induced hyperglycemia in the *ob/ob* mouse. *Physiol Biochem Behav* 26:491–95, 1987
- Linde J, Deckert T: Increase of insulin concentration in maturity-onset diabetics by phentolamine (Regitine) infusion. *Horm Metab Res* 5:391–95, 1973
- Robertson PR, Halter JB, Porte D: A role for alpha-adrenergic receptors in abnormal insulin secretion in diabetes mellitus. *J Clin Invest* 57:791–95, 1976
- Rossier J, Rogers J, Shibasaki T, Guillemin R, Bloom FE: Opioid peptides and melanocyte-stimulating hormones in genetically obese (*ob/ob*) mice during development. *Proc Natl Acad Sci USA* 76:2077–80, 1979
- Vermes I, Steinmetz E, Schroom J, Van Der Veen EA, Tilders FJH: Increased plasma levels of immunoreactive  $\alpha$ -endorphin and corticotropin in non-insulin-dependent diabetes. *Lancet* 2:725–26, 1985
- Konishi S, Tsunoo A, Oysuka M: Enkephalins presynaptically inhibit cholinergic transmission in sympathetic ganglion. *Nature (Lond)* 282:515–16, 1979
- Faden A, Holaday J: Opiate antagonists: a role in the

- treatment of hypovolemic shock. *Science* 205:317–18, 1979
17. McCubbin JA, Surwit RS, Williams RB: Endogenous opiate peptides, stress reactivity and risk for hypertension. *Hypertension* 7:808–11, 1985
  18. Manerelli M, Maggi M, Feo M, Cuomo S, Forti G, Moroni F, Guisti G: Naloxone administration releases catecholamines. *N Engl J Med* 308:654–55, 1983
  19. McCubbin JA, Surwit RS, Kuhn CM, Cochrane C, Feinglos MN: Effect of opiate antagonism on stress-induced hyperglycemia in obese mice (Abstract). *Diabetes* 36 (Suppl. 1):18A, 1987
  20. Saperstein R, Chapin EW, Brady E, Slater EE: The effects of a potent, selective  $\alpha_2$ -adrenoceptor antagonist on glucose and insulin levels in the *ob/ob* mouse (Abstract). *Diabetes* 36 (Suppl. 1):58A, 1987
  21. Kashiwagi A, Harano Y, Suzuki M, Kojima H, Harada M, Nishio Y, Shigeta Y: New  $\alpha_2$ -adrenergic blocker (DG-5128) improves insulin secretion and in vivo glucose disposal in NIDDM patients. *Diabetes* 35:1085–89, 1986
  22. Kawazu S, Suzuki M, Negishi K, Watanabe T, Ishii J: Studies of midaglizole (DG-5128): a new type of oral hypoglycemic drug in healthy subjects. *Diabetes* 36:216–20, 1987
  23. Cherksey B, Altszuler N: Tolbutamide and glyburide differ in effectiveness to displace  $\alpha$ - and  $\beta$ -adrenergic radioligands in pancreatic islet cells and membranes. *Diabetes* 33:499–503, 1984
  24. Selye H: *The Stress of Life*. 2nd ed. New York, McGraw-Hill, 1976
  25. Willis T: *Pharmaceutice Rationalis or the Exercitation of the Operation of Medicines in Humane Bodies: The Works of Thomas Willis*. London, Dring, Harper, & Leigh, 1679
  26. Maudsley H: *The Pathology of Mind*. New York, Appleton, 1899
  27. Kemmer FW, Bisping R, Steingruber HJ, Baar H, Hardtmann F, Schlaghecken R, Berger M: Psychological stress and metabolic control in patients with type I diabetes mellitus. *N Engl J Med* 17:1078–84, 1986
  28. Stabler B, Surwit RS, Lane JD, Morris MA, Litton J, Feinglos MN: Type A behavior pattern and blood glucose control in diabetic children. *Psychosom Med* 49:313–16, 1987
  29. Mikat EM, Hackel DB, Cruz PT, Lebovitz HE: Lowered glucose tolerance in the sand rat (*psammomys obesus*) resulting from esophageal intubation. *Proc Soc Exp Biol Med* 139:1390–91, 1972
  30. Surwit RS, McCubbin JA, Livingston EG, Feinglos MN: Classically conditioned hyperglycemia in the obese mouse. *Psychosom Med* 47:465–68, 1985
  31. Osler W: *The Principles and Practice of Medicine*. New York, Appleton, 1892
  32. Lammers CA, Naliboff BD, Straatmeyer AJ: The effects of progressive relaxation on stress and diabetic control. *Behav Res Ther* 22:641–50, 1984
  33. Surwit RS, Feinglos MN: The effects of relaxation on glucose tolerance in non-insulin-dependent diabetes mellitus. *Diabetes Care* 6:176–79, 1983
  34. Landis B, Javonovic L, Landis E, Peterson CM, Groshen S, Johnson K, Miller NE: Effect of stress reduction on daily glucose range in previously stabilized insulin-dependent diabetic patients (Letter). *Diabetes Care* 8:624–26, 1985
  35. Bradley C, Moses JL, Gamsu DS, Knight G, Ward JD: The effects of relaxation on metabolic control of type I diabetes: a matched controlled study. *Diabetes* 34 (Suppl. 1):17A, 1985
  36. Feinglos MN, Hastedt P, Surwit RS: Effects of relaxation therapy on patients with type I diabetes mellitus. *Diabetes Care* 10:72–75, 1987
  37. Surwit RS, McCubbin JA, Kuhn CM, McGee D, Gerstenfeld DA, Feinglos MN: Alprazolam reduces stress hyperglycemia in *ob/ob* mice. *Psychosom Med* 48:278–82, 1986
